# Supplementary material for: Periodic propagating waves coordinate RhoGTPase network dynamics at the leading and trailing edges during cell migration
Source: eLife. 2020 Jul 24;9:e58165. doi: 10.7554/eLife.58165 (PMC7380942; doi:10.7554/eLife.58165)
Supplement: Supplementary file 2. [file elife-58165-supp2.docx]

| **Supplementary file 2.** **Parameter values (Eq. 12).** | | | | |
| --- | --- | --- | --- | --- |
| **Parameter** | **Value** |  | **Parameter** | **Value** |
|  | 5.0526 |  |  | 2 |
|  | 22.7795 |  |  | 2 |
|  | 19.2456 1/s |  |  | 0.0186 1/s |
|  | 10.5262 1/s |  |  | 0.288 |
|  | 0.0158 |  |  | 0.089 1/s |
|  | 0.2470 1/s |  |  | 0.16 |
|  | 9.5818 1/s |  |  | 100 |
|  | 0.0395 |  |  | 3 |
|  | 0.4902 1/s |  |  | 7.8 |
|  | 0.3591 |  |  | 0.055 |
|  | 0.7707 1/s |  |  | 10 |
|  | 0.0218 |  |  | 0.05 |
|  | 0.1118 1/s |  |  | 0.04 |
|  | 0.0275 |  |  | 1.3 |
|  | 0.5495 1/s |  |  | 0.025 |
|  | 0.0109 |  |  | 0.012 |
|  | 6.7 |  |  | 0.65 |
|  | 1 |  |  | 0.1 |
|  | 0.0005 1/s |  |  | 0.0005 1/s |
|  | 0.0005 1/s |  |  | 0.0005 1/s |
|  | 1.1 |  |  | 0.8 |
|  | 1.85 |  |  | 0.5 |
|  | 0.8 |  |  | 1 |
|  | 112 |  |  | 220 nM |
